# Supplementary material
Source: publisher figshare collection journal article supplement (https://rs.figshare.com/ndownloader/files/17591156)
Supplement: Supplementary file 1 [file 17591156]

## Sheet: Column Information
Column name	Column information
Snail Number	Snail identification number
Treatment	Indicates % resource coverage
Rep	Indicates replicate
Length	Length of snail
Mass	Mass of snail
num-scat	The number of scat at the end of the trial
Mu35	Value of mu for distributions with 35 degrees as the threshold angle
KS35	Kolmogorov-Smirnov goodness-of-fit statistic for distributions with 35 degrees as the threshold angle
Mu55	Value of mu for distributions with 55 degrees as the threshold angle
KS55	Kolmogorov-Smirnov goodness-of-fit statistic for distributions with 55 degrees as the threshold angle
Mu45	Value of mu for distributions with 45 degrees as the threshold angle
xmin	value of x min
AICp	AIC value for power law
KSp	Kolmogorov-Smirnov goodness-of-fit statistic for power-law distributions with 45 degrees as the threshold angle
AICe	AIC value for exponential distribtuion
Kse	Kolmogorov-Smirnov goodness-of-fit statistic for exponential distributions with 45 degrees as the threshold angle
dAICp	Difference between AICp values and the AIC value from best-fitting distribution
dAICe	Difference between AICe values and the AIC value from the best-fitting distribution
AICp weights	Akaike weights for the power-law distributions
AICe weights	Akaike weights for the exponential distributions
# steps	Number of that individual snail performed
Mu.algae	Value of mu for resource patches
Mu.bare	Value of mu for bare patches
Mu.hour.1 - Mu.hour.24	Values of mu for each hour of the 24 hour experiment
Pro.out.1 - pro.out.24	Proportion of time outside center of arena for each hour of the 24 hour experiment

## Sheet: Ballistic to Brownian Data 03
Snail Number	Treatment	Rep	Length (mm)	Mass	num-scat	Mu35	KS35	Mu55	KS55	Mu45	xmin	AICp	KSp	AICe	KSe	dAICp	dAICe	AICp weights	AICe weights	# Steps	Mu.Algae	Mu.Bare	Mu.hour.1	Mu.hour.2	Mu.hour.3	Mu.hour.4	Mu.hour.5	Mu.hour.6	Mu.hour.7	Mu.hour.8	Mu.hour.9	Mu.hour.10	Mu.hour.11	Mu.hour.12	Mu.hour.13	Mu.hour.14	Mu.hour.15	Mu.hour.16	Mu.hour.17	Mu.hour.18	Mu.hour.19	Mu.hour.20	Mu.hour.21	Mu.hour.22	Mu.hour.23	Mu.hour.24	pro.out.1	pro.out.2	pro.out.3
11	0	3	8	25.1669	4	1.79	0.043	2.242	0.048	1.693	0.47	10596.5	0.049	14308.1	0.445	0	3711.62	1	0	2125	NA	NA	1.465	1.514	1.547	1.709	2.284	2.719	1.707	1.798	2.227	1.848	1.711	1.571	1.746	2.288	1.72	1.91	1.697	1.687	1.87	1.75	NA	1.633	1.444	2.035	0.540278	0.395833	0.272222
13	50	3	8	25.1669	7	2.517	0.122	2.445	0.108	2.193	0.977	883.04	0.126	1266.83	0.508	0	383.79	1	4.58206e-84	198	2.372	2.233	2.067	NA	NA	NA	2.956	2.296	NA	NA	NA	NA	NA	NA	NA	NA	NA	NA	NA	NA	NA	NA	NA	NA	NA	NA	0.713889	0.736111	0.897222
15	100	3	8	25.1669	63	3.977	0.081	4.055	0.081	3.885	3.046	3376.62	0.083	4728.62	0.384	0	1352	1	2.61566e-294	943	NA	NA	1.888	3.077	2.38	1.921	NA	2.412	2.479	NA	1.824	NA	NA	NA	NA	NA	NA	1.548	2.348	NA	NA	NA	2.358	6.08	NA	NA	0.55	0.555556	0.586111
16	0	4	9.5	39.7345	8	1.599	0.09	1.553	0.119	1.725	2.718	2110.45	0.091	2363.76	0.39	0	253.31	1	9.87262e-56	254	NA	NA	1.434	NA	NA	1.47	1.677	NA	NA	NA	NA	NA	NA	NA	NA	NA	NA	NA	1.642	NA	NA	NA	NA	2.478	1.786	NA	0.323611	0.738889	0.990278
17	25	4	8.5	29.5664	28	2.797	0.026	2.504	0.04	2.569	1.01	3968.49	0.03	4936.27	0.316	0	967.78	1	7.06713e-211	1034	4.25	2.096	3.496	4.778	3.343	2.574	2.857	NA	NA	1.904	NA	1.99	3.307	1.816	1.648	1.51	2.3	3.201	1.72	NA	3.817	2.019	NA	NA	NA	NA	0.191667	0.776389	0.865278
18	50	4	8	25.1669	57	2.6	0.061	2.54	0.078	2.562	1.35	5485.17	0.064	7148.6	0.339	0	1663.43	1	0	1736	3.965	2.11	1.645	3.731	1.894	2.822	1.65	2.711	1.96	2.255	1.471	1.614	NA	NA	NA	1.93	2.529	2.785	1.953	1.447	1.993	2.748	1.606	NA	3.017	NA	0.447222	0.602778	0.730556
19	75	4	8	25.1669	69	1.913	0.078	1.784	0.078	1.873	0.294	3593.98	0.079	5983.9	0.529	0	2389.92	1	0	1112	5.273	1.364	2.098	2.069	1.604	NA	2.025	2.167	NA	NA	NA	2.073	2.644	2.479	2.083	2.814	2.994	1.898	NA	1.784	2.286	2.951	2.544	3.033	NA	NA	0.229167	0.481944	0.533333
20	100	4	7.5	21.2003	48	3.018	0.037	2.745	0.045	2.888	0.765	2899.3	0.038	3373.42	0.219	0	474.12	1	1.11212e-103	1014	NA	NA	3.346	3.459	3.615	2.207	2.057	2.07	2.156	2.051	2.267	NA	NA	NA	NA	NA	NA	NA	NA	NA	NA	2.696	NA	NA	NA	4.889	0	0.0833333	0.231944
21	0	5	9	34.4165	5	1.839	0.067	1.739	0.095	1.845	0.336	3018.69	0.072	4949.12	0.536	0	1930.43	1	0	833	NA	NA	NA	NA	NA	NA	1.507	NA	NA	NA	2.745	2.544	NA	NA	1.959	1.469	1.768	1.917	2.941	2.257	1.982	3.727	2.553	NA	NA	NA	0.716667	0.786111	0.866667
22	25	5	8	25.1669	72	2.928	0.093	2.626	0.095	2.859	1.29	9730.77	0.099	11410	0.286	0	1679.24	1	0	2422	2.667	2.46	2.829	3.614	1.851	2.757	1.934	2.65	2.411	1.91	1.977	1.689	1.801	1.89	NA	NA	NA	NA	NA	NA	NA	3.054	2.181	5.894	5.745	3.556	0.297222	0.5125	0.222222
23	50	5	8.5	29.5664	147	2.478	0.075	2.198	0.075	2.639	1.219	8208.29	0.073	11647.9	0.425	0	3439.61	1	0	2219	3.247	2.087	1.854	5.863	2.223	1.978	5.332	1.885	1.635	1.346	2.772	1.682	1.439	3.717	3.455	2.24	2.17	3.081	1.68	1.798	NA	NA	NA	2.502	NA	NA	0.0194444	0.1375	0.386111
24	75	5	7	17.6488	134	1.919	0.088	1.929	0.068	2.061	0.651	7565.44	0.091	9201.07	0.34	0	1635.63	1	0	1811	2.769	2.043	2.223	2.234	1.96	1.884	1.748	2.273	2.411	2.253	1.51	2.743	2.38	1.975	1.684	NA	NA	NA	NA	NA	3.379	NA	NA	NA	1.712	NA	0.402778	0.0402778	0.109722
25	100	5	9	34.4165	95	2.395	0.085	2.424	0.068	2.321	0.939	6188.18	0.088	8005.85	0.389	0	1817.67	1	0	1446	NA	NA	3.62	2.652	4.618	2.56	1.818	2.14	1.824	1.431	2.009	1.581	1.728	2.315	1.303	7.201	1.681	NA	NA	NA	NA	NA	NA	NA	2.738	2.369	0.2	0.563889	0.209722
27	25	6	7	17.6488	62	2.054	0.068	1.821	0.074	1.984	0.677	7236.42	0.073	10309.2	0.449	0	3072.78	1	0	1739	2.622	2.487	2.45	3.11	3.288	2.449	1.706	4.009	1.826	1.375	3.885	3.95	3.257	2.46	1.602	NA	NA	NA	NA	2.095	2.727	2.539	NA	NA	NA	NA	0.105556	0.386111	0
28	50	6	7.5	21.2003	64	2.846	0.037	2.253	0.052	2.757	0.468	5351.61	0.037	7703.71	0.308	0	2352.1	1	0	2502	4.987	1.617	5.966	2.94	2.942	5.677	2.441	2.859	2.217	2.272	1.906	3.222	2.087	4.1787	1.591	1.582	2.055	1.959	1.811	2.576	4.531	NA	NA	NA	NA	NA	0	0.166667	0.413889
29	75	6	8	25.1669	147	2.064	0.07	1.703	0.082	2.293	0.861	11483.9	0.074	15714.9	0.396	0	4230.96	1	0	3024	3.136	1.95	2.643	4.288	1.899	1.814	1.727	3.522	5.013	1.96	3.814	2.431	2.058	1.843	2.831	2.039	4.048	2.586	5.898	2.496	1.741	1.607	2.492	3.505	2.482	1.852	0.219444	0.252778	0.444444
30	100	6	9	34.4165	45	4.433	0.059	4.673	0.068	3.948	1.648	4057.52	0.062	6766.61	0.452	0	2709.09	1	0	133	NA	NA	2.874	3.814	3.646	2.645	2.656	2.538	1.87	2.045	1.695	2.109	1.502	2.939	NA	1.527	NA	NA	NA	1.756	NA	NA	NA	NA	NA	NA	0.0388889	0.0972222	0.0305556
31	0	7	8	25.1669	3	1.491	0.107	1.432	0.133	1.394	1.192	1242.72	0.127	1296.71	0.339	0	53.99	1	1.88895e-12	131	NA	NA	1.437	1.542	1.594	NA	NA	NA	NA	NA	NA	NA	NA	NA	NA	NA	NA	NA	NA	NA	NA	NA	NA	NA	NA	NA	0.670833	0.7	0.616667
33	50	7	7.5	21.2003	113	2.614	0.091	2.168	0.078	2.613	1.058	8527.5	0.094	10250.5	0.295	0	1722.95	1	0	2129	NA	NA	5.428	2.162	3.991	1.855	2.474	2.287	1.876	2.406	1.739	3.21	3.902	2.067	2.245	2.075	2.109	2.015	NA	NA	NA	NA	NA	NA	NA	NA	0	0	0
34	75	7	9	34.4165	132	2.639	0.089	1.567	0.062	2.529	1.523	7533.51	0.094	9818.03	0.412	0	2284.52	1	0	1567	3.173	1.42	3.522	1.76	1.654	1.925	3.14	1.583	6.836	3.383	2.656	3.84	4.307	1.555	1.53	NA	NA	2.152	NA	NA	NA	NA	6.385	NA	NA	NA	0	0.0319444	0.0888889
36	0	8	7	17.6488	4	1.766	0.04	1.551	0.048	1.762	0.888	1793.27	0.041	2228.66	0.426	0	435.39	1	2.85932e-95	304	NA	NA	NA	NA	1.707	2.063	NA	1.651	NA	NA	NA	NA	1.841	NA	NA	NA	NA	NA	NA	NA	1.572	NA	NA	NA	NA	NA	0.361111	0.795833	0.694444
37	25	8	7.5	21.2003	46	2.433	0.077	3.853	0.07	2.271	1.152	8566.5	0.083	10092.9	0.322	0	1526.35	1	0	1802	4.638	1.905	4.409	3.094	1.568	2.671	4.04	1.665	2.718	1.897	2.273	1.604	2.419	2.798	1.725	1.523	NA	NA	NA	NA	NA	NA	NA	NA	NA	NA	0	0.105556	0.1375
38	50	8	8	25.1669	117	2.556	0.09	2.511	0.054	2.524	0.831	6122.74	0.092	6892.18	0.208	0	769.44	1	8.28375e-168	1682	4.561	2.357	4.6	3.959	2.309	3.601	2.086	4.886	3.658	1.85	4.201	3.82	3.977	2.017	1.691	1.765	NA	NA	NA	2.071	1.974	NA	NA	NA	NA	NA	0	0	0
39	75	8	7.5	21.2003	114	2.932	0.102	3.134	0.057	2.961	1.271	3760.89	0.107	4545.27	0.274	0	784.38	1	4.72114e-171	952	2.461	2.608	3.654	2.154	3.735	2.022	3.407	1.489	3.694	2.61	NA	NA	NA	NA	NA	NA	NA	NA	NA	NA	NA	NA	NA	NA	NA	NA	0	0	0
40	100	8	6.5	14.4939	64	5.237	0.1	3.928	0.102	4.664	1.507	8745.87	0.099	10175.1	0.245	0	1429.26	1	0	2899	NA	NA	3.986	2.593	2.984	2.257	2.724	2.059	2.382	3	2.68	2.151	1.701	2.245	2.307	NA	NA	NA	NA	3.733	2.923	NA	NA	NA	2.751	3.988	0.0166667	0	0
42	25	9	7.5	21.2003	42	2.391	0.079	2.116	0.086	2.247	1.02	6620.63	0.084	9730.85	0.482	0	3110.22	1	0	1467	3.438	1.689	3.229	3.319	2	1.682	1.354	4.297	NA	NA	4.091	NA	NA	NA	NA	NA	NA	NA	NA	2.96	3.018	2.849	6.447	2.448	1.521	1.742	0	0	0.0430556
43	50	9	6	11.7167	121	2.71	0.073	2.568	0.082	2.636	0.778	6725.67	0.075	10748.6	0.476	0	4022.9	1	0	1954	3.098	2.19	5.265	3.147	5.085	1.747	1.556	NA	2.068	2.22	2.519	1.431	NA	2.5	1.708	2.206	2.08	3.345	2.079	1.406	1.631	1.422	3.519	1.579	4.821	3.038	0	0	0
44	75	9	6	11.7167	54	2.578	0.025	2.469	0.036	2.593	1.974	1940.77	0.025	2612.96	0.438	0	672.19	1	1.08592e-146	388	1.447	2.149	3.483	4.729	2.361	3.819	NA	NA	2.209	1.437	1.514	NA	NA	NA	NA	NA	NA	NA	NA	NA	NA	NA	NA	NA	NA	NA	0	0	0
46	0	10	6	11.7167	3	1.53	0.053	1.405	0.079	1.452	0.483	4754.98	0.064	5913.78	0.442	0	1158.8	1	2.34303e-252	762	NA	NA	1.567	1.501	1.308	NA	1.71	2.025	1.638	NA	NA	NA	1.653	NA	NA	1.549	1.807	NA	NA	1.602	2.079	1.761	NA	NA	1.387	NA	0.261111	0.595833	0.138889
47	25	10	7	17.6488	80	2.733	0.027	2.432	0.036	2.128	0.599	5628.11	0.027	7342.5	0.302	0	1714.39	1	0	1726	3.64	2.494	4.598	5.541	3.133	1.482	NA	NA	NA	NA	2.524	NA	1.521	2.569	1.925	3.07	NA	1.722	2.131	1.83	3.828	4.958	2.354	5.349	2.457	6.349	0.0194444	0	0
48	50	10	8.5	29.5664	88	1.714	0.067	1.635	0.082	1.679	0.191	7700.79	0.069	16164.6	0.654	0	8463.8	1	0	2288	5.192	1.47	2.784	4.203	2.636	1.608	1.791	1.519	1.305	2.034	1.653	2.034	3.396	4.338	1.561	1.58	2.436	1.647	NA	1.323	1.89	5.737	2.288	1.778	2.355	3.054	0	0	0
49	75	10	7.5	21.2003	93	2.937	0.061	2.544	0.068	2.6	1.234	5975.92	0.064	7902.29	0.371	0	1926.37	1	0	1404	2.496	2.292	3.492	5.085	2.467	2.8	NA	NA	NA	NA	NA	NA	NA	NA	NA	NA	2.546	2.12	2.165	5.014	4.397	1.891	1.727	3.325	3.855	5.472	0	0	0
50	100	10	8	25.1669	83	3.223	0.057	3.473	0.057	3.142	1.127	5456.72	0.061	6771.4	0.3	0	1314.68	1	3.31792e-286	1760	NA	NA	5.416	3.268	3.731	2.282	2.24	2.302	2002	2.92	NA	NA	NA	4.056	2.191	1.985	NA	2.384	3.351	3.17	2.624	1.827	2.614	3.385	3.226	3.949	0	0	0
52	25	11	7.5	21.2003	93	2.589	0.124	2.11	0.102	2.226	0.755	13771.4	0.128	16881.2	0.327	0	3109.84	1	0	3331	2.883	1.297	5.011	6.145	2.822	1.679	1.809	3.961	2.643	1.67	3.648	3.487	3.394	2.361	2.008	1.414	1.712	1.861	1.816	2.452	4.155	1.67	NA	2.025	NA	NA	0.190278	0.415278	0.320833
53	50	11	7	17.6488	52	2.537	0.077	3.152	0.064	2.689	0.905	6400.87	0.079	7488.89	0.246	0	1088.02	1	5.48857e-237	1795	3.866	1.508	4.203	2.708	1.709	2.635	5.221	1.766	2.038	2.185	2.756	6.513	2.045	2.554	3.444	NA	NA	NA	1.369	1.822	1.857	NA	NA	NA	NA	NA	0.0708333	0.233333	0.344444
54	75	11	7	17.6488	48	2.239	0.034	2.145	0.047	2.065	0.512	2934.16	0.041	6558.79	0.507	0	3624.63	1	0	1577	NA	NA	3.42	1.684	3.239	2.614	2.531	1.727	2.919	4.384	1.605	2.566	2.149	NA	1.701	2.137	3.748	NA	NA	NA	5.407	NA	NA	1.673	2.892	NA	0.563889	0.633333	0.690278
56	0	12	7	17.6488	3	1.537	0.057	1.427	0.075	1.364	0.462	6768.06	0.068	8360.58	0.44	0	1592.52	1	0	1011	NA	NA	1.597	1.85	1.817	1.715	1.467	1.796	1.451	2.659	1.404	2.588	1.583	NA	1.616	NA	1.413	1.56	1.544	1.381	NA	NA	NA	1.667	1.371	NA	0.713889	0.6375	0.713889
57	25	12	8.5	29.5664	85	1.833	0.124	1.497	0.098	1.875	0.487	10646	0.128	13172.8	0.35	0	2526.82	1	0	2480	3.085	1.072	2.312	2.419	2.038	2.622	3.775	1.608	2.765	NA	1.764	2.819	2.39	1.461	1.713	NA	NA	NA	3.119	1.717	4.962	3.116	3.842	6.176	2.638	1.814	0.509722	0.336111	0.504167
58	50	12	8	25.1669	124	2.351	0.1	1.787	0.107	2.252	0.566	13014.4	0.101	14580.3	0.236	0	1565.85	1	0	3844	4.317	1.808	4.254	3.89	2.126	1.939	6.305	1.982	3.529	2.12	2.152	2.719	2.897	3.961	2.403	2.267	2.392	2.038	1.825	NA	1.762	2.973	4.052	6.795	2.106	3.543	0	0	0.148611
59	75	12	9	34.4165	87	2.09	0.1	1.929	0.067	2.046	0.625	3749.54	0.103	4238.51	0.24	0	488.97	1	6.63e-107	928	4.028	1.339	3.882	2.734	4.036	2.01	4.623	1.551	1.721	4.39	NA	NA	NA	NA	NA	NA	NA	NA	NA	NA	NA	NA	NA	NA	NA	NA	0.144444	0.2625	0
60	100	12	7	17.6488	145	2.535	0.118	3.75	0.113	2.902	0.844	12474.2	0.117	13915.9	0.24	0	1441.69	1	0	3969	NA	NA	2.452	4.488	2.063	5.939	1.657	1.835	2.345	2.157	6.994	2.047	2.199	1.976	1.967	2.063	3.057	2.94	3.454	4.045	2.234	2.364	2.267	NA	4.218	2.535	0.1	0.0458333	0.286111
[truncated: 21 more columns]
